# Supplementary material
Source: MDPI journal article supplement (https://www.mdpi.com/2073-4344/13/6/923)
Supplement: s1 [file s1]

## Supplementary Materials

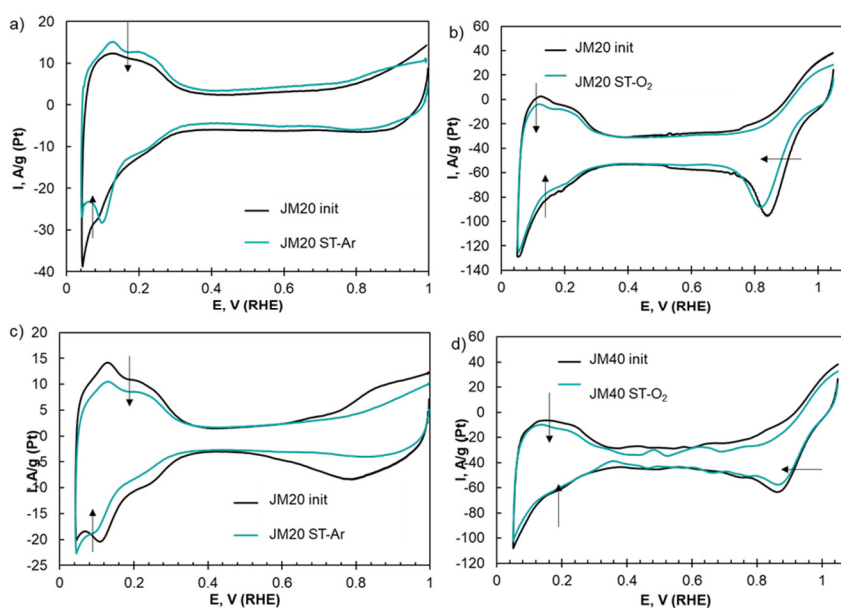

**Figure S1.** The cyclic voltammograms for the electrocatalyst before and after the stress testing: (a) JM20 in an Ar atmosphere, the electrolyte is 0.1 M HClO<sub>4</sub>, the potential sweep rate is 20 mV/s; (b) JM20 in an O<sub>2</sub> atmosphere, the electrolyte is 0.1 M HClO<sub>4</sub>, the potential sweep rate is 50 mV/s at the rotation speed of 50 rpm; (c) JM40 in an Ar atmosphere, the electrolyte is 0.1 M HClO<sub>4</sub>, the potential sweep rate is 20 mV/s; (d) JM40 in an O<sub>2</sub> atmosphere, the electrolyte is 0.1 M HClO<sub>4</sub>, the potential sweep rate is 50 mV/s at the rotation speed of 50 rpm.

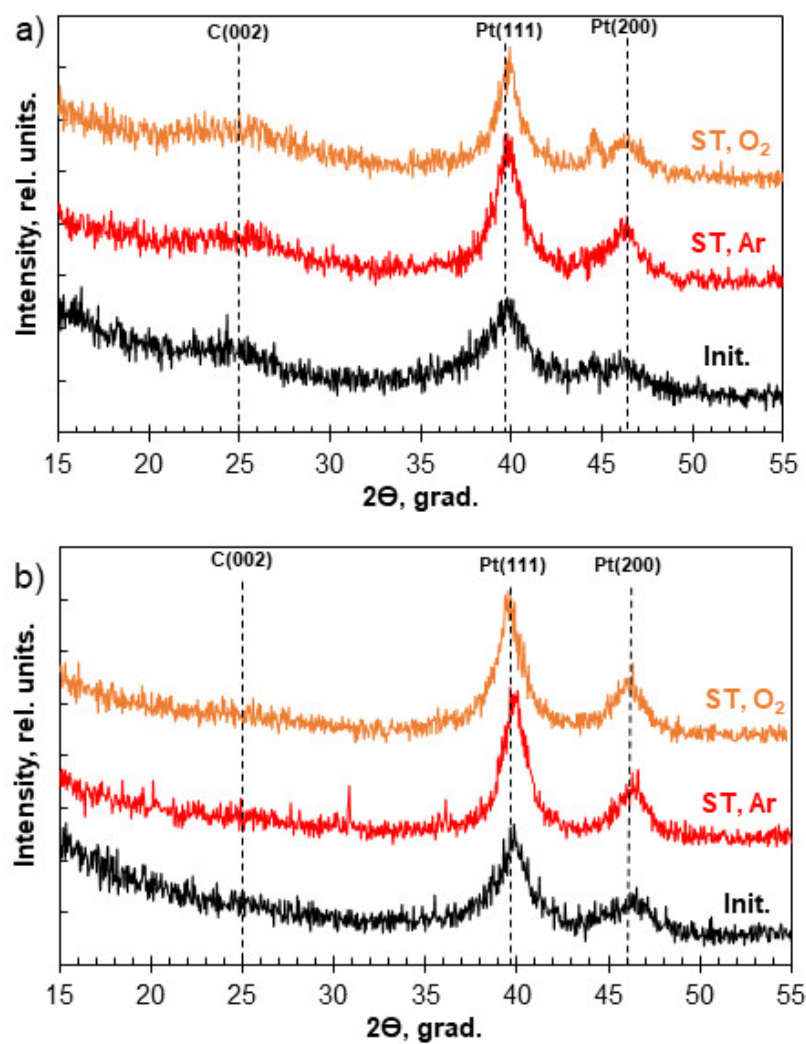

**Figure S2.** The X-ray diffraction patterns for (a) JM20 and (b) JM40 before and after the ADT in the electrolyte saturated with Ar or O<sub>2</sub>.

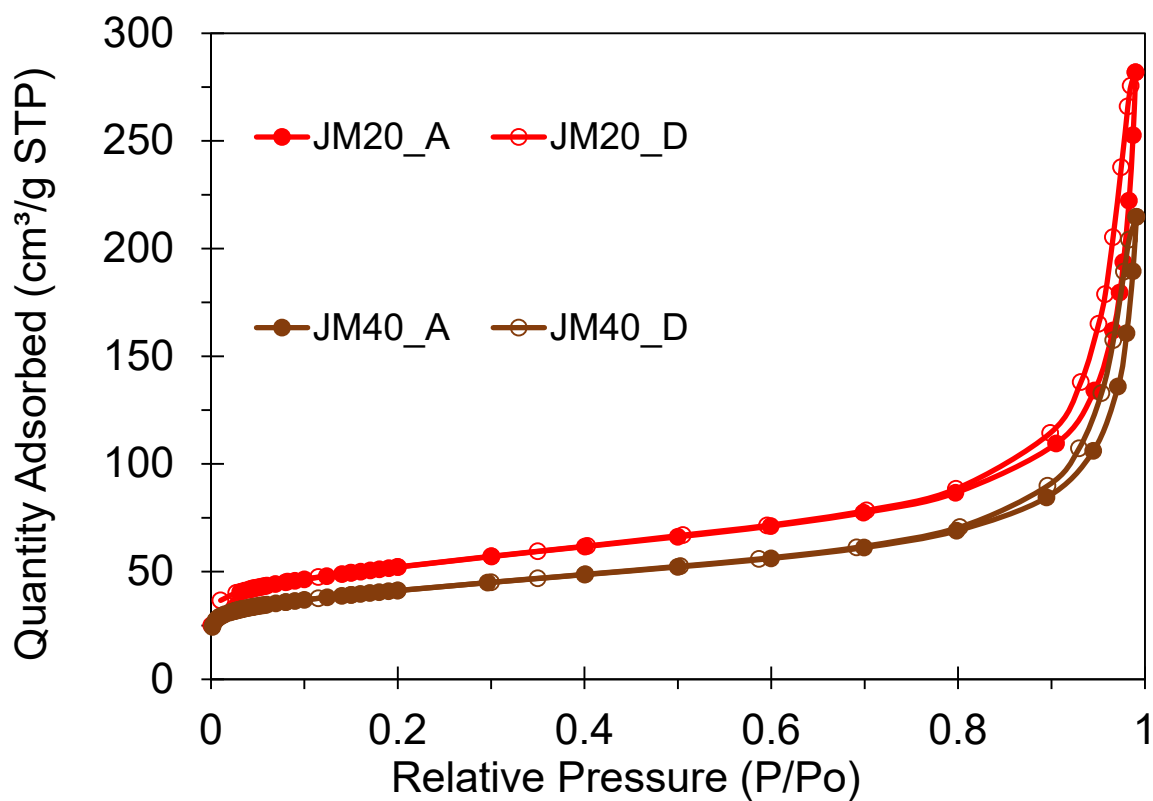

**Figure S3.** Nitrogen adsorption/desorption curves for the commercial Pt/C materials JM20 and JM40.

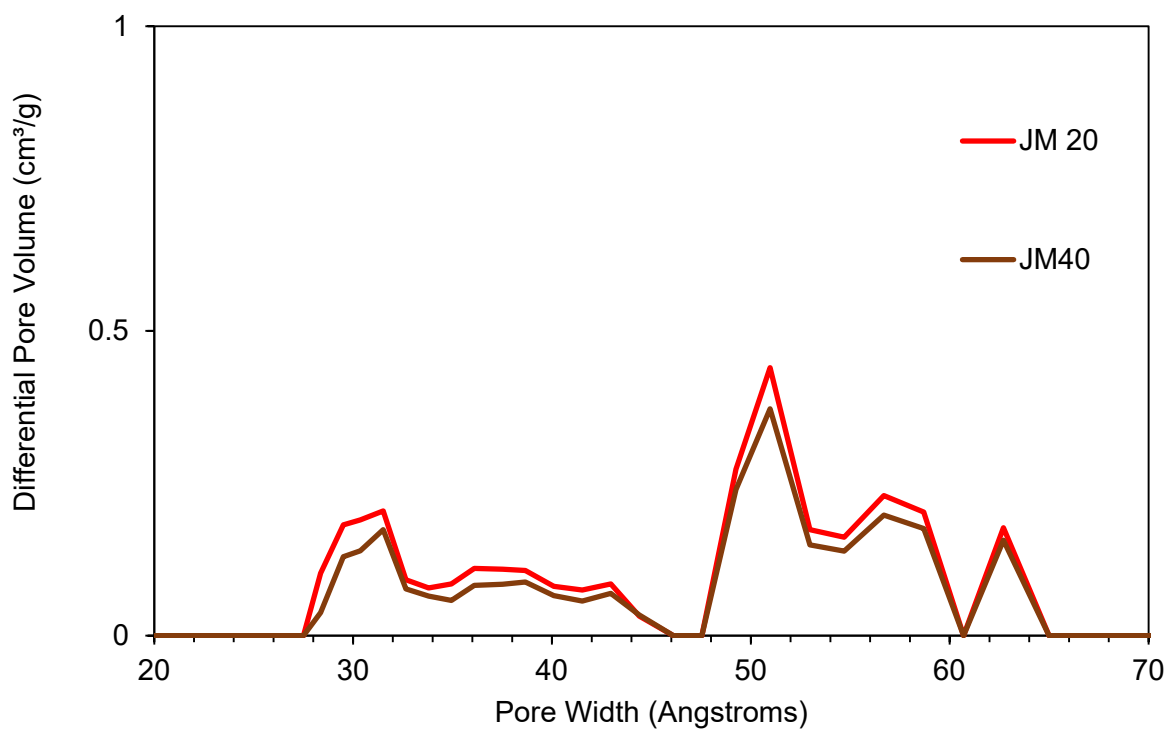

**Figure S4.** The pore size distribution for the commercial Pt/C materials JM20 and JM40.

## *Study of the catalytic structure*

BET analysis was performed using a Micromeritics ASAP 2020 Physisorption BET instrument.

### *1.1 X-ray examination*

The X-ray diffraction patterns for the samples studied were recorded in the range of angles of  $20 \leq 2\theta \leq 55$  degrees by step-by-step scanning with the detector movement step of 0.02 degrees [1].

The X-ray diffraction patterns were processed using the SciDavis software to extract the peak parameters correctly, this being of particular importance when peaks overlapped over one another in the case of small particle sizes [1]. The average crystallite size ( $D_{Av}$ ) was calculated by the Scherrer formula, as described below:

$$D_{Av} = K\lambda / (FWHM \cos\theta),$$

where  $\lambda$  is the wavelength of the monochromatic radiation (in Å),

FWHM is the reflex full width at half maximum (in radians),

$K = 0.89$  is the Scherrer's constant,

$D_{Av}$  is the average thickness of the "stack" of reflecting planes in the coherent scattering region (in Å),

$\theta$  is the angle of incidence of the X-ray beam (in radians). The error margin was  $\pm 8\%$ .

### *1.2 Transmission electron microscopy*

To prepare the sample for measurements, 0.5 mg of the catalyst were placed in 1 ml of isopropanol and dispersed with ultrasound for 10 min. A drop of the resulting suspension was applied to the standard copper grid covered with a 5–6 nm thick layer of amorphous carbon. The sample was then dried in air at room temperature for 60 min.

### *1.3 Preparation of catalytic inks for electrochemical measurements*

When obtaining the suspension of the Pt/C catalysts (catalytic inks), the sample weight was calculated in order that with 8  $\mu$ l of the catalytic suspension being successively applied to the electrode, the platinum weight should be 20  $\mu$ g<sub>Pt</sub>cm<sup>-2</sup>. 100  $\mu$ l of the Nafion® polymer 1 % aqueous emulsion and 100  $\mu$ l of deionized water were then added with introduction of 1800  $\mu$ l of isopropyl alcohol (extra-pure grade). The suspension was dispersed with ultrasound for 25 min at 5–15 °C with alternate stirring every 5 min. Before applying the suspension, the glass–carbon end face of the RDE had been polished and then rinsed with isopropyl alcohol. An 8  $\mu$ l aliquot of the inks was sampled with a pipette tip with constant stirring and applied to the end face of the polished and degreased glass–carbon electrode with the area of 0.196 cm<sup>2</sup>. The electrode was then dried in air for 15 min with the rotation speed of 700 rpm. In this way, the catalytic layer was formed on the RDE.

### *1.4 ESA calculation*

Based on the half-sum of the charge amounts consumed for the electrochemical adsorption ( $Q_{ad}$ ) and desorption ( $Q_d$ ) of atomic hydrogen during the registration of CVs [1], the ESA was calculated according to the formula:

$$ESA = QH / [R \times L],$$

where ESA is the area of the electrochemically active platinum surface, cm<sup>2</sup>/g(Pt),

$Q_H = (Q_{ad} + Q_d)/2$  is the charge amount consumed for the electrochemical adsorption and desorption of hydrogen,

R is the charge amount consumed for the adsorption/desorption of an atomic hydrogen monolayer,  $210 \mu\text{C}/\text{cm}^2(\text{Pt})$ ,

L is the platinum weight on the electrode, g.

The error margin for the ESA calculation was  $\pm 10\%$

#### *1.5 ORR measurement*

To determine the ORR activity of the catalysts, a series of LSVs were measured in the potential range from 0.02 to 1.1 V at the potential sweep rate of 20 mV/s. The electrolyte was pre-oxygenated for 60 min with the RDE rotation speed of 700 rpm. To account for the contribution of the ohmic voltage drop, the potential of the electrode studied was refined by the formula:  $E = E_{\text{set}} - I \cdot R$ , where  $E_{\text{set}}$  is the set value of the potential,  $I \cdot R$  is the ohmic potential drop equal to the product of the current strength by the resistance of the solution layer between the reference electrode and the electrode studied, which was 23 ohms. The contribution of the processes proceeding on the electrode in a deoxygenated solution (an Ar atmosphere) was taken into account by subtracting the equivalent curve, recorded on the same electrode during the measurements in an Ar atmosphere:  $I(\text{O}_2) - I(\text{Ar})$ , from the voltammogram, as described in [2]. The LSVs were recorded at the RDE rotation speeds of 400; 900; 1,600; and 2,500 rpm. The ORR activity of the catalysts (the kinetic current) was determined by the normalized voltammograms, taking into account the contribution of mass transfer under conditions of using the RDE [3,4]. The kinetic current at the potential of 0.90 V (RHE) was calculated using the Koutetsky–Levich equation:  $1/j = 1/j_k + 1/j_d$ , where  $j$  is the experimentally measured current,  $j_d$  is the diffusion current, and  $j_k$  is the kinetic current.

## References

1. Paperzh, K.O.; Alekseenko, A.A.; Volochaev, V.A.; Pankov, I. V.; Safronenko, O.A.; Guterman, V.E. Stability and Activity of Platinum Nanoparticles in the Oxygen Electroreduction Reaction: Is Size or Uniformity of Primary Importance? Beilstein Journal of Nanotechnology 2021, 12, 593–606, doi:10.3762/BJNANO.12.49.
2. Shinozaki, K.; Zack, J.W.; Pylypenko, S.; Pivovar, B.S.; Kocha, S.S. Oxygen Reduction Reaction Measurements on Platinum Electrocatalysts Utilizing Rotating Disk Electrode Technique: II. Influence of Ink Formulation, Catalyst Layer Uniformity and Thickness. J Electrochem Soc 2015, 162, F1384, doi:10.1149/2.0551512JES.
3. Gasteiger, H.A.; Kocha, S.S.; Sompalli, B.; Wagner, F.T. Activity Benchmarks and Requirements for Pt, Pt-Alloy, and Non-Pt Oxygen Reduction Catalysts for PEMFCs. Appl Catal B 2005.
4. Khudhayer, W.J.; Kariuki, N.N.; Wang, X.; Myers, D.J.; Shaikh, A.U.; Karabacak, T. Oxygen Reduction Reaction Electrocatalytic Activity of Glancing Angle Deposited Platinum Nanorod Arrays. J Electrochem Soc 2011, doi:10.1149/1.3599901.

**Table S1.** Publication data on activity and stability of commercial Pt/C electrocatalyst.

| Sample | Stress test condition                                                                   | ESA, m <sup>2</sup> /g(Pt) |          | I, A/g(Pt) |          | Stability, % | Ref.      |
|--------|-----------------------------------------------------------------------------------------|----------------------------|----------|------------|----------|--------------|-----------|
|        |                                                                                         | Initial                    | After ST | Initial    | After ST |              |           |
| JM20   | 10,000 cycles<br>0.4 and 1.0 V, 3s,<br>(PP), 0.1M<br>HClO <sub>4</sub> , Ar             | 84                         | 56       | 254        | 152      | 67           | This work |
| JM20   | 10,000 cycles<br>0.4 and 1.0 V, 3s<br>(PP), 0.1 M<br>HClO <sub>4</sub> , O <sub>2</sub> | 84                         | 48       | 254        | 108      | 57           | This work |
| JM20   | 18,000 cycles<br>0.6-1.0 V<br>0.1M HClO <sub>4</sub> , O <sub>2</sub>                   | 81                         | 70       | 299        | -        | 87           | 5         |
| JM20   | 10,000 cycles<br>0.6 – 1.4 V<br>0.5M H <sub>2</sub> SO <sub>4</sub> , N <sub>2</sub>    | 47                         | 10       | -          | -        | 22           | 6         |
| JM20   | 10,000 cycles<br>0.60 - 1.05 V<br>air-contained<br>0.1M HClO <sub>4</sub>               | 79                         | 52       | 210        | 110      | 66           | 7         |
| JM20   | 10,000 cycles<br>0.6 – 1.2 V<br>0.1M HClO <sub>4</sub> , N <sub>2</sub>                 | 60                         | 12       | 72         | -        | 20           | 8         |
| JM20   | 5000 cycles<br>0.6 – 1.2 V<br>0.1M HClO <sub>4</sub> , N <sub>2</sub> ,                 | 56                         | 34       | 74         | 20       | 61           | 9         |
| JM40   | 10,000 cycles<br>0.4 and 1.0 V, 3s<br>(PP), 0.1M<br>HClO <sub>4</sub> , Ar              | 56                         | 43       | 159        | 108      | 77           | This work |
| JM40   | 10,000 cycles<br>0.4 and 1.0 V, 3s<br>(PP), 0.1M<br>HClO <sub>4</sub> , O <sub>2</sub>  | 56                         | 46       | 159        | 135      | 82           | This work |
| JM40   | 30,000 cycles<br>0.6-1 V<br>0.1M HClO <sub>4</sub> ,                                    | 54.8                       | 38       | 230        | -        | 70           | 10        |
| JM40   | 5000 cycles<br>0.6 – 1.24 V<br>0.5M H <sub>2</sub> SO <sub>4</sub> , N <sub>2</sub> ,   | 46                         | 8        | -          | -        | 17           | 11        |
| JM40   | 6000 cycles<br>0.6 – 1.0 V                                                              | 51                         | 34       | -          | -        | 67           | 11        |

|      |                                                                         |    |   |      |   |   |    |
|------|-------------------------------------------------------------------------|----|---|------|---|---|----|
|      | 0.5M H <sub>2</sub> SO <sub>4</sub> , N <sub>2</sub>                    |    |   |      |   |   |    |
| JM40 | 10,000 cycles<br>0.6 – 1.0 V<br>0.1M HClO <sub>4</sub> , N <sub>2</sub> | 40 | - | 76.4 | - | - | 12 |

\*(PP) - rectangular pulses in the potential

## References

5. Erwan Bertin, Adrian Münzer, Sven Reichenberger, Rene Streubel, Thomas Vinnay, Hartmut Wiggers, Christof Schulz, Stephan Barcikowski, Galina Marzun, Durability study of platinum nanoparticles supported on gas-phase synthesized graphene in oxygen reduction reaction conditions, *Applied Surface Science*, 2019, V. 467–468, pp. 1181-1186, doi.org/10.1016/j.apsusc.2018.10.061.
6. Wang, Y., Jin, J., Yang, S., Li, G., & Qiao, J. (2015). Highly active and stable platinum catalyst supported on porous carbon nanofibers for improved performance of PEMFC. *Electrochimica Acta*, 177, 181–189. doi:10.1016/j.electacta.2015.01.134.
7. Huang, J.; Ding, C.; Yang, Y.; Liu, G.; Cai, W. bin An Alternate Aqueous Phase Synthesis of the Pt<sub>3</sub>Co/C Catalyst towards Efficient Oxygen Reduction Reaction. *Chinese Journal of Catalysis* 2019, 12, 40, doi:10.1016/S1872-2067(19)63338-3.
8. Chen, X., He, D., Wu, H., Zhao, X., Zhang, J., Cheng, K., ... Mu, S. (2015). Platinized Graphene/ceramics Nano-sandwiched Architectures and Electrodes with Outstanding Performance for PEM Fuel Cells. *Scientific Reports*, 5(1). doi:10.1038/srep16246.
9. R. Lin et al., High durability of Pt-Ni-Ir/C ternary catalyst of PEMFC by stepwise reduction synthesis, *Electrochimica Acta*, <https://doi.org/10.1016/j.electacta.2019.13525>
10. Angel, G. M. A., Mansor, N., Jarvis, R., Rana, Z., Gibbs, C., Seel, A., ... Cullen, P. Realising the Electrochemical Stability of Graphene: Scalable Synthesis of Ultra-durable Platinum Catalyst for the Oxygen Reduction Reaction, *Nanoscale*, 2020, V.12, pp. 16113–16122 doi:10.1039/d0nr03326j.
11. Wang, X. X., Tan, Z. H., Zeng, M., & Wang, J. N. (2014). Carbon nanocages: A new support material for Pt catalyst with remarkably high durability. *Scientific Reports*, 2014, 4(1), Article number: 4437, doi:10.1038/srep04437.
12. Qing Zhao, Cheng Wang, Haifeng Wang, Jianlong Wang, Yaping Tang, Zongqiang Mao, Kazunari Sasaki (2020) H<sub>2</sub>-induced thermal treatment significantly influences the development of a high performance low-platinum core-shell PtNi/C alloyed oxygen reduction catalyst // *International Journal of Energy Research*, vol. 44, P. 4773–4783, DOI: 10.1002/er.5265.
